# Supplementary material for: Continent-wide tree fecundity driven by indirect climate effects
Source: PubMed Central journal article supplement (PMC7902660; doi:10.1038/s41467-020-20836-3), 2021-02-23
Supplement: 41467_2020_20836_MOESM1_ESM.pdf [file 41467_2020_20836_MOESM1_ESM.pdf]

## Description of Additional Supplementary Files

**File Name:** Supplementary Data 1

**Description:** Information for sites shown in Figure 1 of the main text listed by ecoRegion. Data type indicates crop counts (CC) or seed traps (ST). The PI(s) column lists coauthors of this study.

**File Name:** Supplementary Data 2

**Description:** Sample sizes by species in inventory data and MASTIF network, listed by family.

Variables are defined in Table 1 of the main text. Sample-sizes are I trees: trees on inventory plots; M trees: number of trees on MASTIF plots; M plots: number of MASTIF plots; M tree-yr: number of MASTIF treeyears. Symbols highlight species-predictor combinations having zero below or above the 95% credible interval ('++' and '---', respectively) or the 68% credible interval ('+' and '-', respectively)

Gaaino PDF Printer  
www.gaaino.com
